# Supplementary material
Source: PubMed Central journal article supplement (PMC4096078)

## Supplementary Figure 1

|     |     |     |     |     |     |     |     |     |     |     |     |     |     |     |     |     |
|-----|-----|-----|-----|-----|-----|-----|-----|-----|-----|-----|-----|-----|-----|-----|-----|-----|
| 1   | GTC | AGG | ATC | ATG | GGA | GAG | AAT | GGC | CCT | CTC | TCG | GAG | ACA | GCC | ATG | 45  |
| 0   |     |     |     | M   | G   | E   | N   | G   | P   | L   | S   | E   | T   | A   | M   | 12  |
| 46  | CTC | TTT | GAA | GAC | GAG | GAA | GAG | GAT | GTG | GAC | AAA | CTT | GGC | CGA | GAA | 90  |
| 13  | L   | F   | E   | D   | E   | E   | E   | D   | V   | D   | K   | L   | G   | R   | E   | 27  |
| 91  | GAG | GAA | GAC | GAG | GAC | AAG | ATG | GCA | AAC | TTT | GAC | AAA | GAC | GGC | AAC | 135 |
| 28  | E   | E   | D   | E   | D   | K   | M   | A   | N   | F   | D   | K   | D   | G   | N   | 42  |
| 136 | ATG | ATC | TCG | GGC | CCC | TCG | TCC | TCC | TCG | GGA | ACC | GTC | TAC | GAT | CGC | 180 |
| 43  | M   | I   | S   | G   | P   | S   | S   | S   | S   | G   | T   | V   | Y   | D   | R   | 57  |
| 181 | ACC | ACC | GTT | CTC | ATC | GAG | CAG | GAC | CCG | ATC | CGT | CTG | GAT | GAG | GAA | 225 |
| 58  | T   | T   | V   | L   | I   | E   | Q   | D   | P   | I   | R   | L   | D   | E   | E   | 72  |
| 226 | GGA | GAA | GAG | GAC | GGT | ATG | ACG | TTC | CTG | CCG | GAG | GGA | GAG | GGA | GAC | 270 |
| 73  | G   | E   | E   | D   | G   | M   | T   | F   | L   | P   | E   | G   | E   | G   | D   | 87  |
| 271 | GAG | GGA | TCT | CTG | GCC | TTC | ATG | GGT | GAC | CCT | GAC | GGC | ATG | TCA | CAG | 315 |
| 88  | E   | G   | S   | L   | A   | F   | M   | G   | D   | P   | D   | G   | M   | S   | Q   | 102 |
| 316 | GGG | TAC | ATC | CAC | CAC | ACC | ATC | TCG | CCG | GAC | CAA | ATC | CAG | TTC | ATC | 360 |
| 103 | G   | Y   | I   | H   | H   | T   | I   | S   | P   | D   | Q   | I   | Q   | F   | I   | 117 |
| 361 | ATT | AAC | CCC | GGG | TCC | ACA | CCT | ATG | CCA | CGA | AAC | ATC | GAG | GGC | GCC | 405 |
| 118 | I   | N   | P   | G   | S   | T   | P   | M   | P   | R   | N   | I   | E   | G   | A   | 132 |
| 406 | ACG | CTG | ACA | TTA | CAC | TCT | GAG | TGC | CCA | GAG | ACC | AAG | CAG | AGA | GAG | 450 |
| 133 | T   | L   | T   | L   | H   | S   | E   | C   | P   | E   | T   | K   | Q   | R   | E   | 147 |
| 451 | GTG | AAG | AGA | TAC | CAG | TGT | CTG | TTC | GAA | GGC | TGT | ACG | CGC | ACC | TAC | 495 |
| 148 | V   | K   | R   | Y   | Q   | C   | L   | F   | E   | G   | C   | T   | R   | T   | Y   | 162 |
| 496 | AGC | ACG | GCG | GGA | AAC | CTG | CGC | ACT | CAT | CAG | AAG | ACG | CAC | CGT | GGC | 540 |
| 163 | S   | T   | A   | G   | N   | L   | R   | T   | H   | Q   | K   | T   | H   | R   | G   | 7   |
| 541 | GAA | TAC | ACG | TTT | GTT | TGC | AAC | CAG | CAA | GGC | TGC | GGC | AAA | GCC | TTC | 585 |
| 178 | E   | Y   | T   | F   | V   | C   | N   | Q   | Q   | G   | C   | G   | K   | A   | F   | 192 |
| 586 | CTC | ACA | TCC | TAC | AGC | CTG | AAG | ATC | CAC | GTC | CGC | GTC | CAC | ACA | AAG | 630 |
| 193 | L   | T   | S   | Y   | S   | L   | K   | I   | H   | V   | R   | V   | H   | T   | K   | 207 |
| 631 | GAA | AAA | CCC | TTC | GAG | TGT | GAC | GTC | CAG | GGC | TGT | GAG | AAA | GCC | TTC | 675 |
| 208 | E   | K   | P   | F   | E   | C   | D   | V   | Q   | G   | C   | E   | K   | A   | F   | 222 |
| 676 | AAC | ACT | CTC | TAC | AGA | CTG | AAA | GCA | CAC | CAG | AGG | CTG | CAC | ACC | GGG | 720 |
| 223 | N   | T   | L   | Y   | R   | L   | K   | A   | H   | Q   | R   | L   | H   | T   | G   | 237 |
| 721 | AAG | ACG | TTT | AAC | TGT | GAA | TCA | GAG | GGA | TGC | ACC | AAG | TAC | TTC | ACC | 765 |
| 238 | K   | T   | F   | N   | C   | E   | S   | E   | G   | C   | T   | K   | Y   | F   | T   | 252 |
| 766 | ACA | CTC | AGT | GAC | CTG | AGG | AAG | CAC | ATC | CGC | ACA | CAC | ACT | GGC | GAA | 810 |
| 253 | T   | L   | S   | D   | L   | R   | K   | H   | I   | R   | T   | H   | T   | G   | E   | 267 |

|      |     |     |     |     |     |     |     |     |     |     |     |     |     |     |     |      |
|------|-----|-----|-----|-----|-----|-----|-----|-----|-----|-----|-----|-----|-----|-----|-----|------|
| 811  | AAA | CCC | TTC | CGG | TGT | GAT | CAC | GAT | GGC | TGT | GGT | AAG | GCT | TTC | GCT | 855  |
| 268  | K   | P   | F   | R   | C   | D   | H   | D   | G   | C   | G   | K   | A   | F   | A   | 282  |
| 856  | GCT | AGT | CAT | CAC | CTG | AAA | ACA | CAT | GTA | CGG | ACA | CAC | ACT | GGA | GAG | 900  |
| 283  | A   | S   | H   | H   | L   | K   | T   | H   | V   | R   | T   | H   | T   | G   | E   | 297  |
| 901  | AAA | CCG | TTT | TTC | TGT | CCC | AGC | GAC | GGC | TGT | GAG | AAA | ACC | TTC | AGC | 945  |
| 298  | K   | P   | F   | F   | C   | P   | S   | D   | G   | C   | E   | K   | T   | F   | S   | 312  |
| 946  | TCT | CAG | TAC | AGT | CTG | AAG | AGC | CAC | ATC | CGG | GGT | CAC | GAC | AAA | GGC | 990  |
| 313  | S   | Q   | Y   | S   | L   | K   | S   | H   | I   | R   | G   | H   | D   | K   | G   | 327  |
| 991  | CCA | TCG | TTC | ACC | GTG | AGC | AGT | CAT | CCA | CTG | TCA | GAG | GAT | GCG | AAT | 1035 |
| 328  | P   | S   | F   | T   | V   | S   | S   | H   | P   | L   | S   | E   | D   | A   | N   | 342  |
| 1036 | CAC | TCG | CTG | TGC | CTC | AGT | GAT | TTG | AGC | CTC | ATT | TCA | ACA | GAC | TCT | 1080 |
| 343  | H   | S   | L   | C   | L   | S   | D   | L   | S   | L   | I   | S   | T   | D   | S   | 357  |
| 1081 | GAG | CTC | CAG | GAG | AAC | CAC | AAT | TCT | CAG | GGT | TTG | GAT | CTG | AAC | AGC | 1125 |
| 358  | E   | L   | Q   | E   | N   | H   | N   | S   | Q   | G   | L   | D   | L   | N   | S   | 372  |
| 1126 | GTC | ACC | CCC | ATA | CGA | ATC | TTT | GAG | CTC | ATG | TTC | CAG | AGT | CCA | GAG | 1170 |
| 373  | V   | T   | P   | I   | R   | I   | F   | E   | L   | M   | F   | Q   | S   | P   | E   | 387  |
| 1171 | AAC | AGC | GTC | AGC | GAG | GAC | GAC | CCC | AAA | CCT | ACA | GAA | AGC | CTA | GCA | 1215 |
| 388  | N   | S   | V   | S   | E   | D   | D   | P   | K   | P   | T   | E   | S   | L   | A   | 402  |
| 1216 | GAG | TCT | TTT | GGA | CTT | GAG | CCG | TCG | CCT | CAG | ACA | GCC | CCT | GCA | GAC | 1260 |
| 403  | E   | S   | F   | G   | L   | E   | P   | S   | P   | Q   | T   | A   | P   | A   | D   | 417  |
| 1261 | GCG | TCC | ACT | CAT | CCA | GCG | TTC | CCT | CAG | CCT | CCT | CCA | TCC | ACC | TGT | 1305 |
| 418  | A   | S   | T   | H   | P   | A   | F   | P   | Q   | P   | P   | P   | S   | T   | C   | 432  |
| 1306 | TCC | TCT | TCC | TGC | TCC | ATC | ACA | GCT | CCT | GCT | CAG | GAT | GCT | CAG | ACT | 1350 |
| 433  | S   | S   | S   | C   | S   | I   | T   | A   | P   | A   | Q   | D   | A   | Q   | T   | 447  |
| 1351 | CCT | CCC | ACA | ACA | CAG | CAA | GCC | CCG | CCC | CCT | GCT | GTC | AGC | AGC | TCG | 1395 |
| 448  | P   | P   | T   | T   | Q   | Q   | A   | P   | P   | P   | A   | V   | S   | S   | S   | 462  |
| 1396 | TCA | CAG | ACC | TCC | TCC | TTC | CCC | AGT | GCT | CCG | CCC | AGC | TCG | TCA | CAG | 1440 |
| 463  | S   | Q   | T   | S   | S   | F   | P   | S   | A   | P   | P   | S   | S   | S   | Q   | 477  |
| 1441 | CCT | GCA | GAA | GTA | TCG | TCT | CCA | TCT | GCA | CCC | TCA | GCC | ACT | CAG | CAC | 1485 |
| 478  | P   | A   | E   | V   | S   | S   | P   | S   | A   | P   | S   | A   | T   | Q   | H   | 492  |
| 1486 | TAC | ATG | ATG | GCT | CAG | CCG | GTG | TCG | TCT | CCA | TCT | GCA | GCC | AGT | GTC | 1530 |
| 493  | Y   | M   | M   | A   | Q   | P   | V   | S   | S   | P   | S   | A   | A   | S   | V   | 507  |
| 1531 | TCC | AGT | GTG | CCG | GCT | GGG | ACA | GCA | GAG | GTG | ACG | GCC | GCA | GTG | ACG | 1575 |
| 508  | S   | S   | V   | P   | A   | G   | T   | A   | E   | V   | T   | A   | A   | V   | T   | 522  |
| 1576 | CAC | ACA | GTG | CCT | TTG | GCT | GCT | CCT | CCT | ACA | ATC | AGC | ATC | GCC | CCC | 1620 |
| 523  | H   | T   | V   | P   | L   | A   | A   | P   | P   | T   | I   | S   | I   | A   | P   | 537  |
| 1621 | ACA | CTC | GGC | CTG | CAG | CCC | AGC | CTT | GTC | ATG | TCA | GAC | CAG | AAC | CTG | 1665 |
| 538  | T   | L   | G   | L   | Q   | P   | S   | L   | V   | M   | S   | D   | Q   | N   | L   | 552  |



# Supplementary Figure 2

**A**

## Human $\alpha$ A Crystallin Promoter

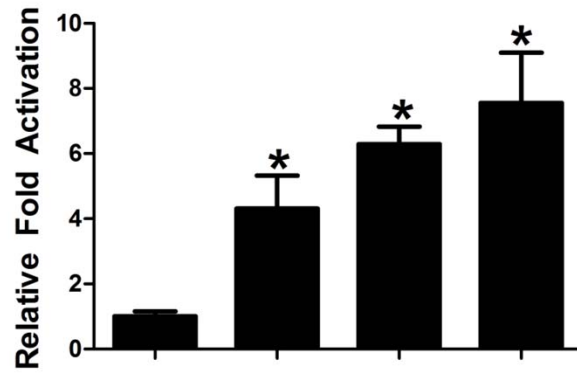

|                                |   |    |    |    |
|--------------------------------|---|----|----|----|
| $\alpha$ A crystallin promoter | + | +  | +  | +  |
| zebrafish MTF-1                | + | +  | +  | +  |
| Zinc concentration ( $\mu$ M)  | 0 | 25 | 50 | 75 |

**B**

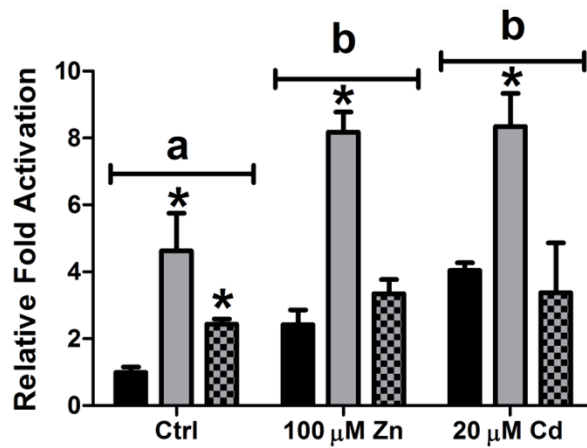

- aA-Crystallin
- aA-Crys + zfMTF-1
- aA-Crys + zfMTF-1 + dnMTF-1

# Supplementary Figure 3

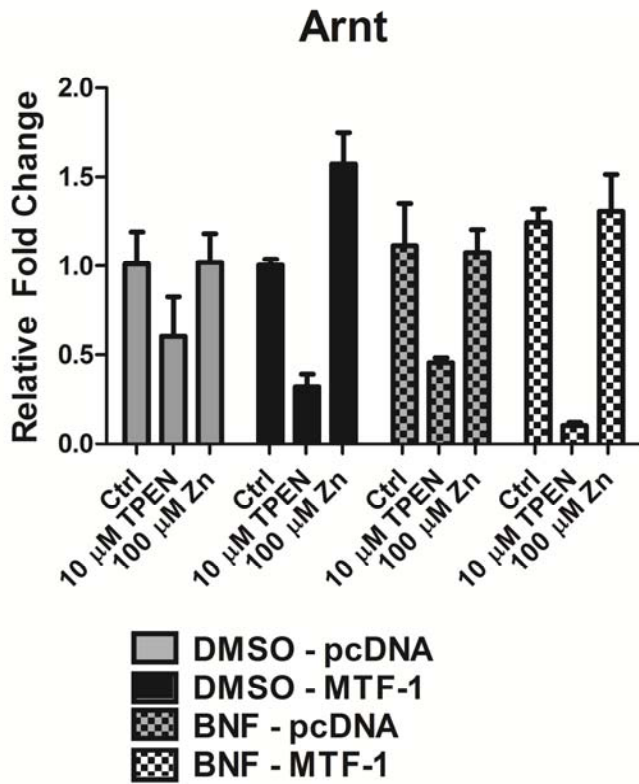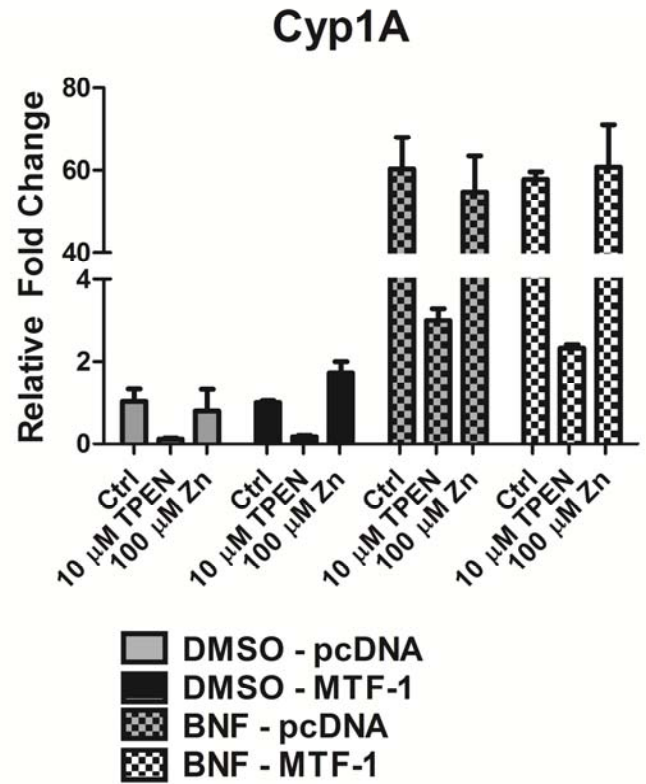

# Supplementary Figure 4

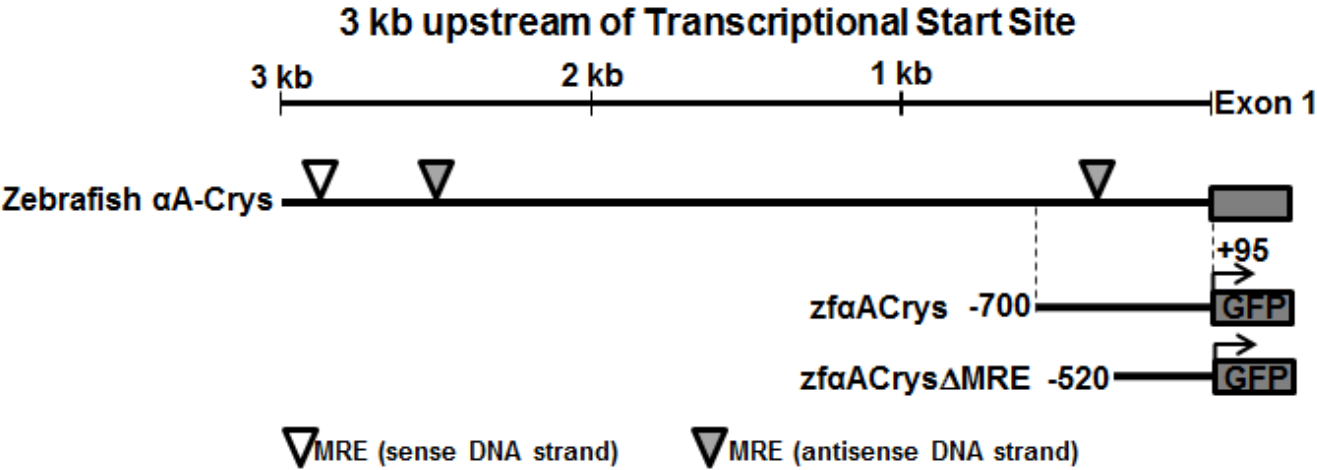

zfaACrys

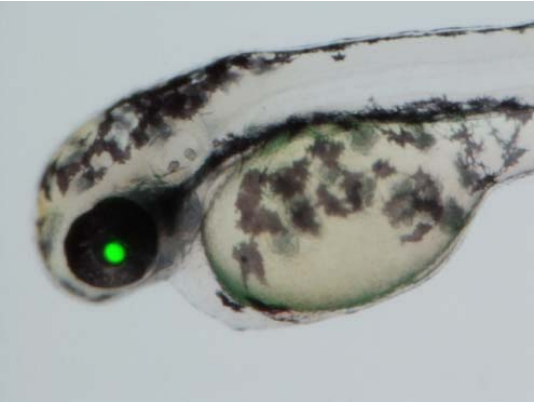

zfaACrys $\Delta$ MRE

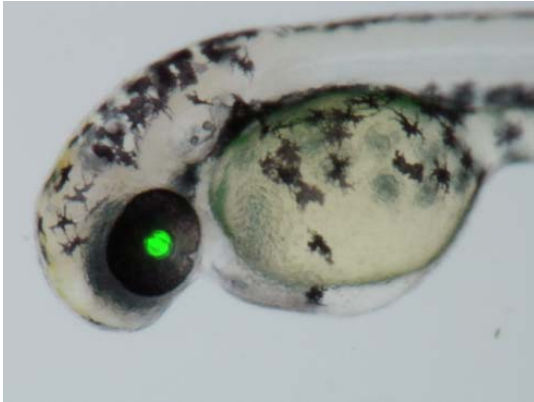

Supplement: NIHMS588484-supplement-05.pdf [file NIHMS588484-supplement-05.pdf]
